# Supplementary material for: Orm protein phosphoregulation mediates transient sphingolipid biosynthesis response to heat stress via the Pkh-Ypk and Cdc55-PP2A pathways
Source: PubMed Central journal article supplement — Mol Biol Cell. 2012 Jun 15;23(12):2388–98. doi: 10.1091/mbc.E12-03-0209 (PMC3374756; doi:10.1091/mbc.e12-03-0209), 2012-06-15
Supplement: supp_E12-03-0209v1_CombinedSupMats.pdf [file supp_E12-03-0209v1_CombinedSupMats.pdf]

Table 1. The yeast strains used in this study.

| <b>Strain</b> | <b>Genotype</b>                                                                                                                                                                    |
|---------------|------------------------------------------------------------------------------------------------------------------------------------------------------------------------------------|
| DDY1102       | <i>MATa/MAT<math>\alpha</math> his3-<math>\Delta</math>200/his3-<math>\Delta</math>200 ura3-52/ura3-52 leu2-3,112/leu2-3,112 lys2-801/LYS2 ade2-1/ADE2</i>                         |
| DDY904        | <i>MAT<math>\alpha</math> his3-<math>\Delta</math>200 leu2-3, 112, ura3-52</i>                                                                                                     |
| DDY5101       | <i>MAT<math>\alpha</math> his3-<math>\Delta</math>200 leu2-3, 112 ura3-52 3XFLAG-ORM1::NAT</i>                                                                                     |
| DDY5102       | <i>MAT<math>\alpha</math> his3-<math>\Delta</math>200 leu2-3, 112 ura3-52 3XFLAG-ORM2::NAT</i>                                                                                     |
| DDY5103       | <i>MAT<math>\alpha</math> his3-<math>\Delta</math>200 leu2-3, 112 ura3-52 orm2<math>\Delta</math>::CgURA3 3XFLAG-ORM1::NAT</i>                                                     |
| DDY5104       | <i>MAT<math>\alpha</math> his3-<math>\Delta</math>200 leu2-3, 112 ura3-52 orm1<math>\Delta</math>::CgLEU2 3XFLAG-ORM2::NAT</i>                                                     |
| DDY5105       | <i>MAT<math>\alpha</math> his3-<math>\Delta</math>200 leu2-3, 112 ura3-52 pph21<math>\Delta</math>::CgHIS3</i>                                                                     |
| DDY5106       | <i>MAT<math>\alpha</math> his3-<math>\Delta</math>200 leu2-3, 112 ura3-52 pph22<math>\Delta</math>::CgLEU2</i>                                                                     |
| DDY5107       | <i>MAT<math>\alpha</math> his3-<math>\Delta</math>200 leu2-3, 112 ura3-52 pph22<math>\Delta</math>::CgLEU2 pph21<math>\Delta</math>::CgHIS3</i>                                    |
| DDY5108       | <i>MAT<math>\alpha</math> his3-<math>\Delta</math>200 leu2-3, 112 ura3-52 cdc55<math>\Delta</math>::CgHIS3</i>                                                                     |
| DDY5109       | <i>MAT<math>\alpha</math> his3-<math>\Delta</math>200 leu2-3, 112 ura3-52 rts1<math>\Delta</math>::CgURA3</i>                                                                      |
| DDY5110       | <i>MAT<math>\alpha</math> his3-<math>\Delta</math>200 leu2-3, 112 ura3-52 tpd3<math>\Delta</math>::CgLEU2</i>                                                                      |
| DDY5111       | <i>MAT<math>\alpha</math> his3-<math>\Delta</math>200 leu2-3, 112 ura3-52 pph21<math>\Delta</math>::CgHIS3 3XFLAG-ORM2::NAT</i>                                                    |
| DDY5112       | <i>MAT<math>\alpha</math> his3-<math>\Delta</math>200 leu2-3, 112 ura3-52 pph22<math>\Delta</math>::CgLEU2 3XFLAG-ORM2::NAT</i>                                                    |
| DDY5113       | <i>MAT<math>\alpha</math> his3-<math>\Delta</math>200 leu2-3, 112 ura3-52 pph22<math>\Delta</math>::CgLEU2 pph21<math>\Delta</math>::CgHIS3 3XFLAG-ORM2::NAT</i>                   |
| DDY5114       | <i>MAT<math>\alpha</math> his3-<math>\Delta</math>200 leu2-3, 112 ura3-52 cdc55<math>\Delta</math>::CgHIS3 3XFLAG-ORM2::NAT</i>                                                    |
| DDY5115       | <i>MAT<math>\alpha</math> his3-<math>\Delta</math>200 leu2-3, 112 ura3-52 rts1<math>\Delta</math>::CgURA3 3XFLAG-ORM2::NAT</i>                                                     |
| DDY5116       | <i>MAT<math>\alpha</math> his3-<math>\Delta</math>200 leu2-3, 112 ura3-52 tpd3<math>\Delta</math>::CgLEU2 3XFLAG-ORM2::NAT</i>                                                     |
| DDY5117       | <i>MAT<math>\alpha</math> his3-<math>\Delta</math>200 leu2-3, 112 ura3-52 orm1<math>\Delta</math>::CgLEU2 orm2<math>\Delta</math>::CgURA3</i>                                      |
| DDY5118       | <i>MAT<math>\alpha</math> his3-<math>\Delta</math>200 leu2-3, 112 ura3-52 orm1<math>\Delta</math>::CgLEU2 3XFLAG-orm2 (S46A, S47A, S48A)::NAT</i>                                  |
| DDY5119       | <i>MAT<math>\alpha</math> his3-<math>\Delta</math>200 leu2-3, 112 ura3-52 orm1<math>\Delta</math>::CgLEU2 3XFLAG-orm2 (S46D, S47D, S48D)::NAT</i>                                  |
| DDY5120       | <i>MAT<math>\alpha</math> his3-<math>\Delta</math>200 leu2-3, 112 ura3-52 orm1<math>\Delta</math>::CgLEU2 3XFLAG-orm2 (S46A, S47A, S48A)::NAT</i>                                  |
| DDY5121       | <i>MAT<math>\alpha</math> his3-<math>\Delta</math>200 leu2-3, 112 ura3-52 orm1<math>\Delta</math>::CgLEU2 3XFLAG-orm2 (S46D, S47D, S48D)::NAT</i>                                  |
| DDY5122       | <i>MAT<math>\alpha</math> his3-<math>\Delta</math>200 leu2-3, 112 ura3-52 cdc55<math>\Delta</math>::CgHIS3 orm1<math>\Delta</math>::CgLEU2</i>                                     |
| DDY5123       | <i>MAT<math>\alpha</math> his3-<math>\Delta</math>200 leu2-3, 112 ura3-52 cdc55<math>\Delta</math>::CgHIS3 orm1<math>\Delta</math>::CgLEU2 orm2<math>\Delta</math>::CgURA3</i>     |
| DDY5124       | <i>MAT<math>\alpha</math> his3-<math>\Delta</math>200 leu2-3, 112 ura3-52 cdc55<math>\Delta</math>::CgHIS3 orm1<math>\Delta</math>::CgLEU2 3XFLAG-ORM2::NAT</i>                    |
| DDY5125       | <i>MAT<math>\alpha</math> his3-<math>\Delta</math>200 leu2-3, 112 ura3-52 cdc55<math>\Delta</math>::CgHIS3 orm1<math>\Delta</math>::CgLEU2 3XFLAG-orm2 (S46A, S47A, S48A)::NAT</i> |
| DDY5126       | <i>MAT<math>\alpha</math> his3-<math>\Delta</math>200 leu2-3, 112 ura3-52 cdc55<math>\Delta</math>::CgHIS3 orm1<math>\Delta</math>::CgLEU2 3XFLAG-orm2 (S46D, S47D, S48D)::NAT</i> |
| DDY5127       | <i>MAT<math>\alpha</math> his3-<math>\Delta</math>200 leu2-3, 112 ura3-52 pph21<math>\Delta</math>::CgHIS3 orm1<math>\Delta</math>::CgLEU2</i>                                     |

|         |                                                                                                                       |
|---------|-----------------------------------------------------------------------------------------------------------------------|
| DDY5128 | <i>MATa his3-Δ200 leu2-3, 112 ura3-52 pph21Δ::CgHIS3 orm1Δ::CgLEU2 orm2Δ::CgURA3</i>                                  |
| DDY5129 | <i>MATa his3-Δ200 leu2-3, 112 ura3-52 pph21Δ::CgHIS3 orm1Δ::CgLEU2 3XFLAG-ORM2::NAT</i>                               |
| DDY5130 | <i>MATa his3-Δ200 leu2-3, 112 ura3-52 pph21Δ::CgHIS3 orm1Δ::CgLEU2 3XFLAG-orm2 (S46A, S47A, S48A)::NAT</i>            |
| DDY5131 | <i>MATa his3-Δ200 leu2-3, 112 ura3-52 pph21Δ::CgHIS3 orm1Δ::CgLEU2 3XFLAG-orm2 (S46D, S47D, S48D)::NAT</i>            |
| DDY5132 | <i>MATa his3-Δ200 leu2-3, 112 ura3-52 rts1Δ::CgURA3 orm1Δ::CgLEU2</i>                                                 |
| DDY5133 | <i>MATa his3-Δ200 leu2-3, 112 ura3-52 rts1Δ::CgURA3? orm1Δ::CgLEU2 orm2Δ::CgURA3</i>                                  |
| DDY5134 | <i>MATa his3-Δ200 leu2-3, 112 ura3-52 rts1Δ::CgURA3 orm1Δ::CgLEU2 3XFLAG-ORM2::NAT</i>                                |
| DDY5135 | <i>MATa his3-Δ200 leu2-3, 112 ura3-52 rts1Δ::CgURA3 orm1Δ::CgLEU2 3XFLAG-orm2 (S46A, S47A, S48A)::NAT</i>             |
| DDY5136 | <i>MATa his3-Δ200 leu2-3, 112 ura3-52 rts1Δ::CgURA3 orm1Δ::CgLEU2 3XFLAG-orm2 (S46D, S47D, S48D)::NAT</i>             |
| DDY5137 | <i>MATα his3-Δ200 leu2-3, 112 ura3-52 pph22Δ::CgLEU2 pph21Δ::CgHIS3 ura3-52::pph21 (E102K)::URA3 3XFLAG-ORM2::NAT</i> |
| DDY5138 | <i>MATa his3-Δ200 leu2-3, 112 ura3-52 lcb5Δ::CgURA3 lcb4Δ::CgLEU2 3XFLAG-ORM2::NAT</i>                                |
| DDY5139 | <i>MATα his3-Δ200 leu2-3, 112 ura3-52 pkh1Δ::CgLEU2 pkh2Δ::CgHIS3 ura3-52::pkh1-as::URA3 3XFLAG-ORM2::NAT</i>         |
| DDY5140 | <i>MATα his3-Δ200 leu2-3, 112, ura3-52 cdc55Δ::CgHIS3 lcb1-100</i>                                                    |
| DDY5141 | <i>MATα his3-Δ200 leu2-3, 112, ura3-52 lcb1-100</i>                                                                   |
| DDY5142 | <i>MATα his3-Δ200 leu2-3, 112, ura3-52 ypk1Δ::CgLEU2, ypk2Δ::CgHIS3, ura3-52::ypk1-as::URA3, Flag-orm2::NAT</i>       |
| DDY5143 | <i>MATα his3-Δ200 leu2-3, 112, ura3-52 lcb3Δ::CgHIS3, 3XFLAG-ORM2::NAT</i>                                            |

Table 2, The primers used in this study.

| <b>Name</b>        | <b>Primer sequence</b>                                                                                    |
|--------------------|-----------------------------------------------------------------------------------------------------------|
| HindIII-ORM2-F     | GGGAAGCTTATTAAATTTAGGGTCCCCGGCA                                                                           |
| Flag-ORM2-inter-R  | TTGTAATCGATGTCATGATCTTTATAATCACCGTCAT<br>GGTCTTTGTAGTCCATGATGAAACTGTTTCTTATGCG<br>TTTTTA                  |
| Flag-ORM2-inter-F  | ATGGACACAAAGACCATGACGGTGATTATAAAGATC<br>ATGACATCGATTACAAGGATGACGATGACAAGATGA<br>TTGACCCGCACTAAAAACGAATCT  |
| XhoI-ORM2-R        | GGGCTCGAGGGCGTAGGTATATGCTATGACATGA                                                                        |
| NatR-ORM2-F        | CCCAAGCTTACATGGAGGCCCAGAATACCCTCCTTG<br>ACA                                                               |
| NatR-ORM2-R        | CCCACTAGTACTCCAACAACGACAGCGGATGCGCTG<br>TTCTGCGGATGCGTGACCGTATCCGCAAAGAACGAA<br>GCAGTATAGCGACCAGCATTACATA |
| HindIII-ORM1-F     | GGGAAGCTTAGCGCCACCTGTCTTCAG                                                                               |
| Flag-ORM1-inter-R  | TCCTTGTAATCGATGTCATGATCTTTATAATCACCGT<br>CATGGTCTTTGTAGTCCATTAATAACTAAATGGATAAAAA<br>TGCAAT               |
| Flag-ORM1-inter-F  | ATGGACTACAAAGACCATGACGGTGATTATAAAGAT<br>CATGACATCGATTACAAGGATGACGATGACAAGATG<br>ACCGAATTAGATTATCAAGGAACT  |
| XhoI-ORM1-R        | GGGCTCGAGCTTCAGCATCTTTTTCCCA                                                                              |
| NatR-ORM1-F        | CCCCTCGAGACATGGAGGCCCAGAATACCCTCCTTG<br>ACA                                                               |
| NatR-ORM1-R        | CCCGGGCCCATATTATAGCCTTTATCAACAATGGAAT<br>CCCAACAATTATCTAATTACCCACATATATCTCACCA<br>GTATAGCGACCAGCATTACATA  |
| ORM2-3A-F          | CCATAGGAGAAGACGGGCAGCCCGTAATATCACAA<br>TGTGGAACAGG                                                        |
| ORM2-3A-R          | CCTGTTCCACATGTGATATTACGGCGGCTGCCCGTCT<br>TCTCCTATGG                                                       |
| ORM2-3D-F          | CCAGTGACCGACCATAGGAGAAGACGGGATGACGAC<br>GTAATATCACATGTGGAACAGG                                            |
| ORM2-3D-R          | CCTGTTCCACATGTGATATTACGTCGTCATCCCGTCT<br>TCTCCTATGGTCGGTCACTGG                                            |
| PKH1-XhoI-F        | CCGCTCGAGCGGCAACTGATGATACTGATATGCC                                                                        |
| PKH1-SacII-R       | TCCCCGCGGGGAGCTACATACGATGTAGGCTA                                                                          |
| PKH1-F187V/L203A-F | GCTGAATGGCACCAAGGGCATAGTTAAGCTTTTCTTC<br>ACTTTCCAGGACGAGGCAAGCTTGATTTCTT-<br>TGCTGAATATGCCCCCACGGTGATTTC  |
| PKH1-F187V/L203A-R | GAAATCACCGTGGGGGGCATATTCAGCAAGGAAATA<br>CAAGCTTGCCTCGTCCTGGAAAGTGAAGAAAAGCTT<br>AACTATGCCCTTGGTGCCATTCAGC |
| PPH21-BamHI-F      | GGGGGATCCTTCTGTCTGCTTGAAAGATTT                                                                            |
| PPH21-NotI-R       | GGGGCGGCCGCTCCAATGGCAAGACGTCTGAACT                                                                        |

|               |                                                              |
|---------------|--------------------------------------------------------------|
| PPH21-E102K-F | GGCGGTGGACGTGTTGCAGTTCAAGGAGAATGTAA<br>ACCAATTAACGTGCC       |
| PPH21-E102K-R | GGCACGTTAATTGGTTTAACATTCTCCTTGAAGTCA<br>ACACGTCCACCGCC       |
| OYS227        | GGAGAACTATGGCCAAACAGC                                        |
| OYS228        | CCTGCTATACATGGCCGCTG                                         |
| OYS267        | TCCAATCACCGGAAAAATTATACTTTGTTGCAGCGTT<br>TATCAATGGTGGTGAGTTG |
| OYS268        | CAACTCACCACCATTGATAAACGCTGCAACAAAGTA<br>TAATTTTTCCGGTGATTGGA |

## Supplemental Figure Legends

### Sup Figure 1

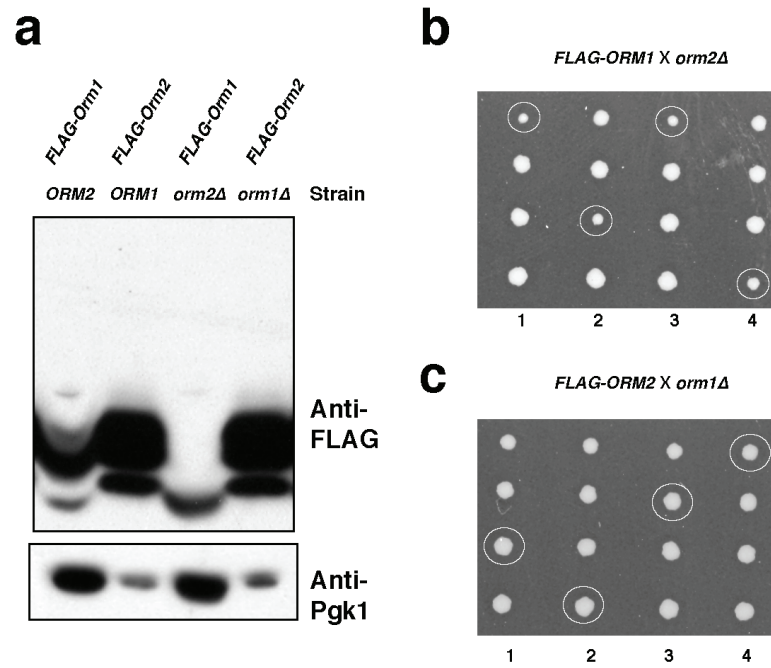

Supplemental Figure 1,

Functionality of FLAG tagged Orm proteins.

(a), Phosphorylation status of FLAG-Orm1 and FLAG-Orm2 in various strain backgrounds. Western blots reveal Orm1 or Orm2 phosphorylation patterns after separation on phosphate affinity gels. The 3- phosphoglycerate kinase 1(Pgk1) was used as a loading control. Note that ten times as much FLAG-Orm1-containing cell extracts were loaded compared to the FLAG-Orm2 extracts. (b) and (c), Tetrad analysis of heterozygous diploid strains obtained by crossing 3XFLAG tagged Orm1 and *orm2Δ* (b) or crossing 3XFLAG tagged Orm2 and *orm1Δ* (c). Circled colonies in (b) represent *FLAG-ORM1 orm2Δ* mutants and circled colonies in (c) represent *FLAG-ORM2 orm1Δ* mutants. Note that 3XFLAG tagged Orm1 in *orm2Δ* strain, but not 3XFLAG tagged Orm2 in *orm1Δ* strain, exhibits slow cell growth.

## Sup Figure 2

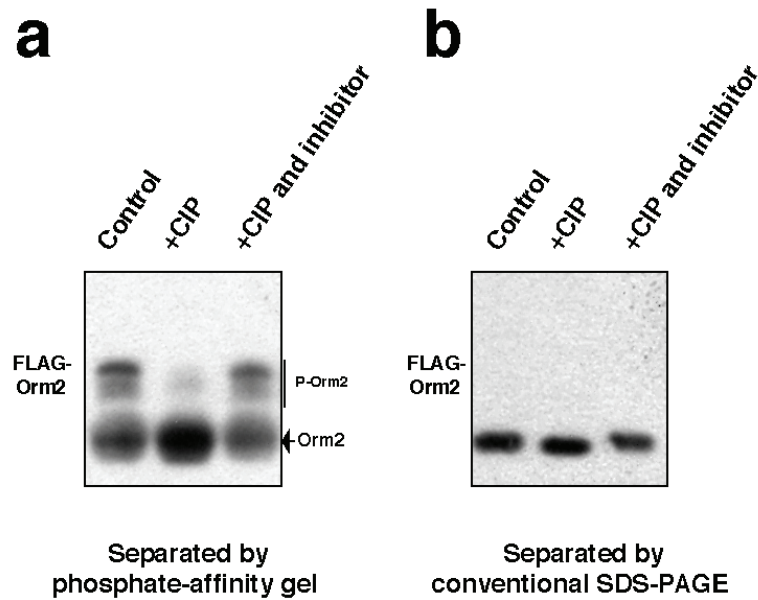

Supplemental Figure 2,

Calf intestine phosphatase (CIP) treatment of Orm2 protein.

Immunoprecipitations (IP) were performed with cell lysates using anti-FLAG resin (Sigma), as previously described by Breslow *et al*<sup>1</sup>. The IP samples were treated with CIP in the presence and absence of phosphatase inhibitor (sodium orthovanadate). Western blots show the phosphorylation patterns after separation on a phosphate affinity gel (a) or on a conventional SDS-PAGE gel (b). Note that the phosphate affinity gel greatly improves the separation of phosphorylated Orm2 from unphosphorylated Orm2.

### Sup Figure 3

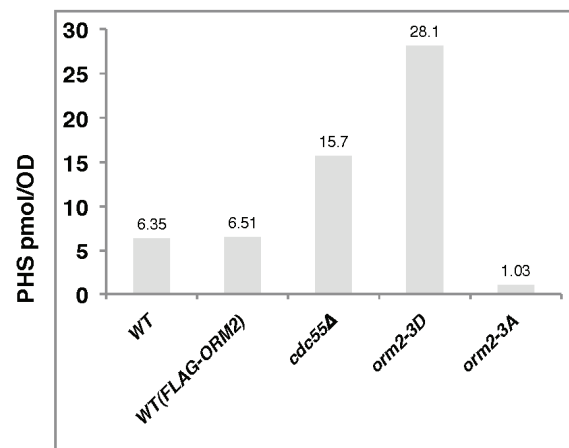

Supplemental Figure 3,

Sphingoid base concentrations in various mutants. The C18-PHS concentration was determined in indicated mutants by HPLC.

## Sup Figure 4

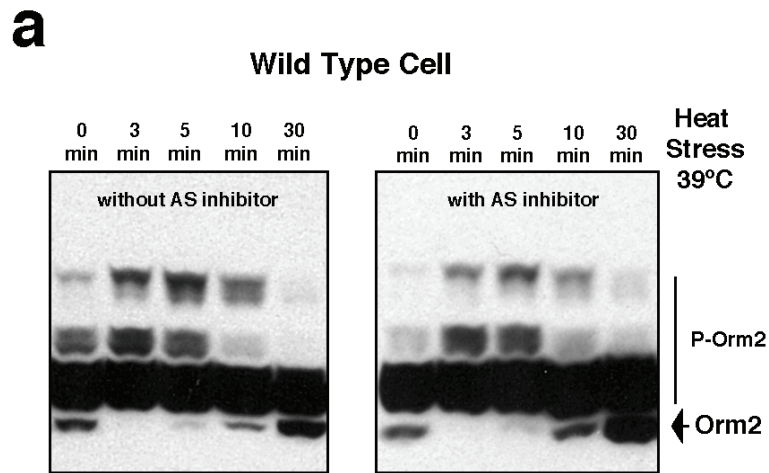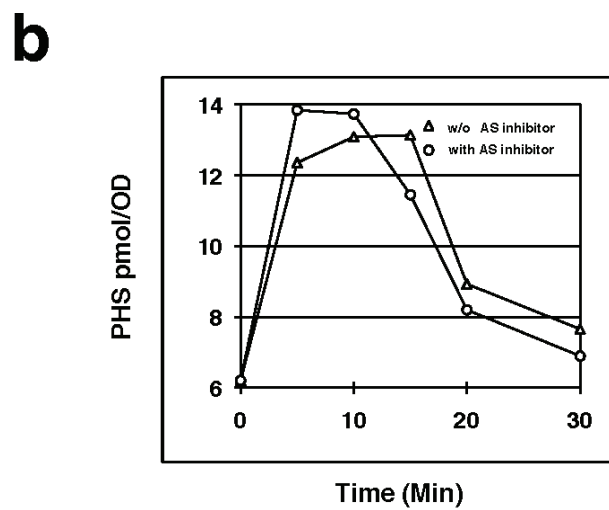

Supplemental Figure 4,

3-MOB-PP1 does not affect heat stress induced Orm phosphorylation and sphingoid base production in wild-type cells. (a), Orm2 phosphorylation upon heat stress in the absence and the presence of 3-MOB-PP1 in wild-type cells. (b), Concentration of C18-PHS in the wild type cells cultured in the absence (line with triangle) and the presence (line with circle) of 50 $\mu$ M 3-MOB-PP1 under heat stress for indicated times.



## References

- 1, Breslow, D. K. *et al.* Orm family proteins mediate sphingolipid homeostasis. *Nature* **463**, 1048-1053, doi:10.1038/nature08787 (2010).
